# Supplementary material for: Phospholipid flippases and Sfk1p, a novel regulator of phospholipid asymmetry, contribute to low permeability of the plasma membrane
Source: PubMed Central journal article supplement — Mol Biol Cell. 2018 May 15;29(10):1203–18. doi: 10.1091/mbc.E17-04-0217 (PMC5935070; doi:10.1091/mbc.e17-04-0217), 2018-05-15
Supplement: mbc-29-1203-s001.pdf [file mbc-29-1203-s001.pdf]

# Supplemental Materials

*Molecular Biology of the Cell*

Mioka et al.

## Supplemental Materials

Figure S1.

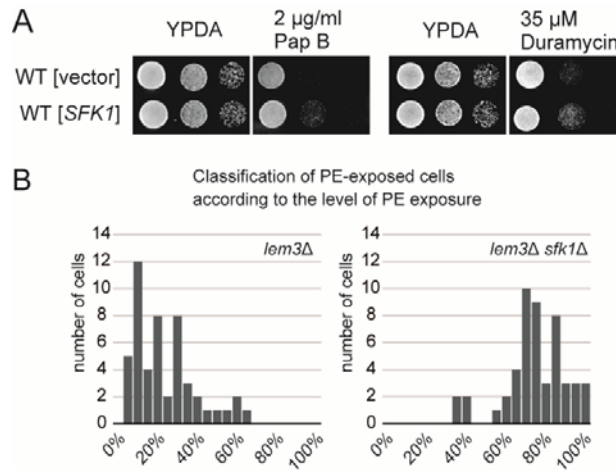

**Figure S1.**(A) Overexpression of *SFK1* does not suppress the sensitivity to either pap B or duramycin in wild-type cells. Wild-type cells transformed with YEp24 or YEp24-*SFK1* were cultured in SDA-U medium at 30°C, serially diluted, and spotted onto YPDA plates containing 2  $\mu\text{g/ml}$  pap B or 35  $\mu\text{M}$  duramycin, followed by incubation for 1.5 days at 30°C. (B) Quantitative analysis of PE-exposed area in *lem3Δ* and *lem3Δsfk1Δ* cells. Ratio of the PE-exposed region per cell periphery was calculated by ImageJ for each cell in Figure 1G, and number of cells for the calculated percentage is shown. Fifty cells were analyzed for each mutant.

Figure S2.

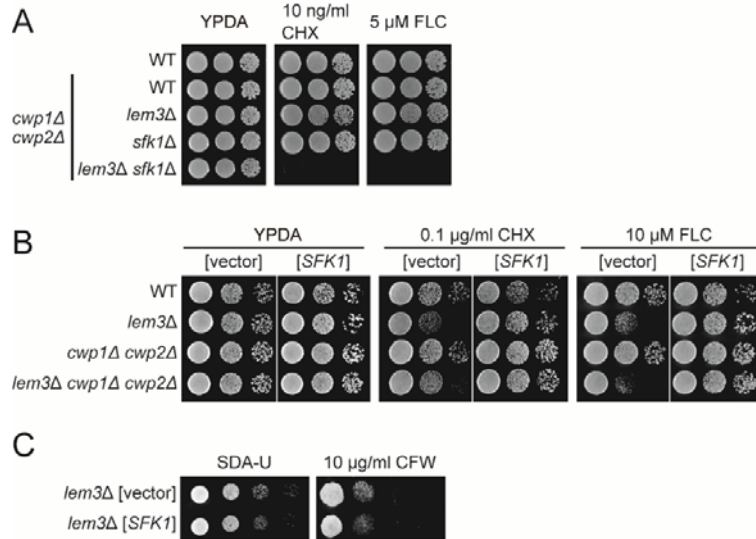

**Figure S2.** The effects of deletion or overexpression of *SFK1* on drug sensitivity are not mediated by alteration of cell wall integrity. (A and B) Sensitivity to CHX and FLC was not changed in the *cwp1Δcwp2Δ* background. (A) Cells were cultured in YPDA medium at 30°C, serially diluted, and spotted onto YPDA plates containing 10 ng/ml CHX or 5 μM FLC, followed by incubation for 2 days at 30°C. (B) Cells transformed with YEp24 or YEp24-*SFK1* were cultured in SDA-U medium at 30°C, and cell growth was examined as in (A) on YPDA plates containing 0.1 μg/ml CHX or 10 μM FLC. (C) Overexpression of *SFK1* did not confer resistance to CFW in *lem3Δ* cells. *lem3Δ* cells transformed with YEp24 or YEp24-*SFK1* were cultured in SDA-U medium at 30°C, and cell growth was examined as in (A) on YPDA plates containing 10 μg/ml CFW. CHX; cycloheximide, FLC; fluconazole, CFW; calcofluor white.

Figure S3

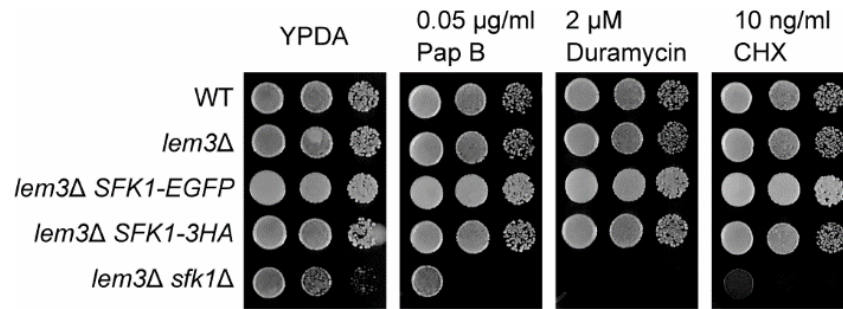

**Figure S3.**C-terminally tagged versions of Sfk1p are functional. Cells were cultured in YPDA medium at 30°C, serially diluted, and spotted onto YPDA plates containing 0.05 μg/ml pap B, 2 μM duramycin, or 10 ng/ml CHX, followed by incubation for 1.5 days at 30°C.

Figure S4

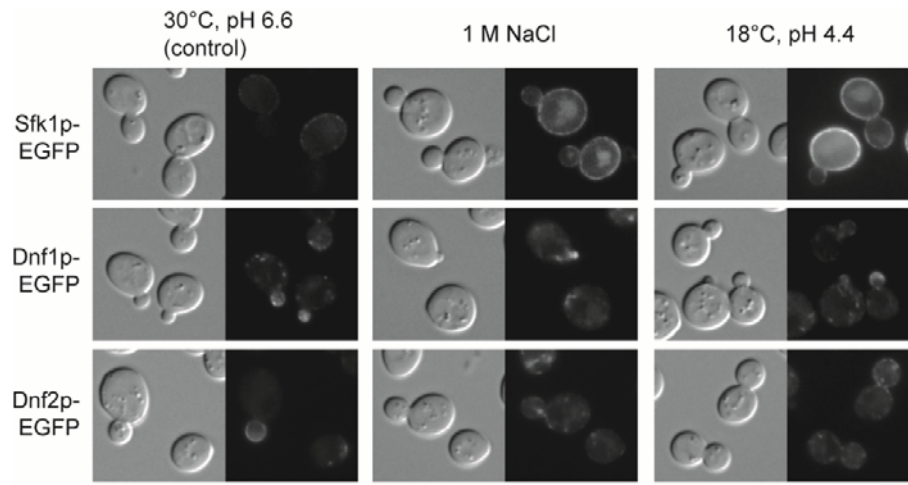

**Figure S4.** The expression level of Dnf1p and Dnf2p is not altered under stress conditions. Sfk1p-EGFP-, Dnf1p-EGFP-, or Dnf2p-EGFP-expressing wild-type cells were cultured in YPDA medium under the indicated conditions for 8 h in the exponential phase, and subjected to fluorescence microscopy. The signal intensity of Dnf1p-EGFP or Dnf2p-EGFP was not changed under stress conditions ( $n > 100$  cells). Scale bar: 5  $\mu\text{m}$ .

Figure S5

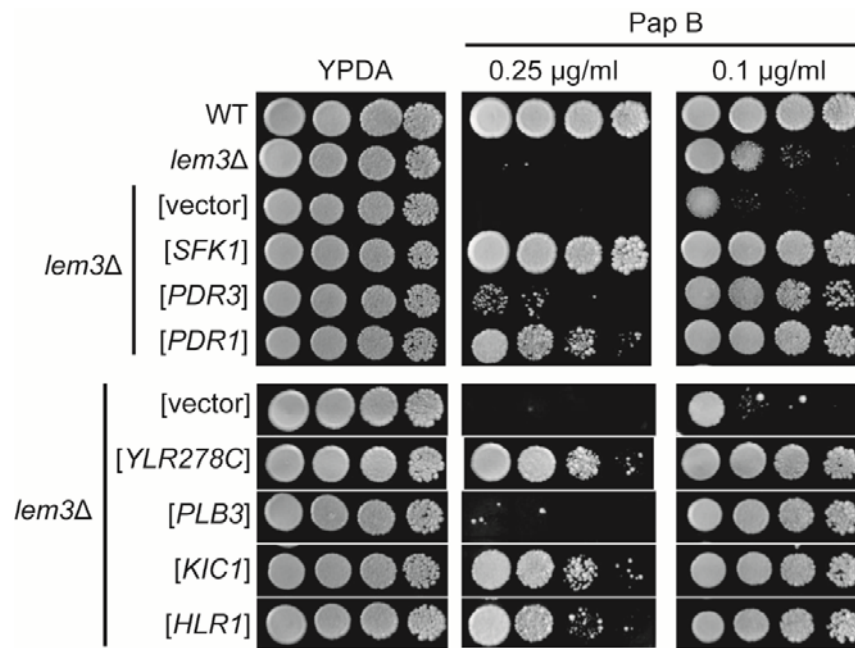

**Figure S5.**Suppression of the papuamide B (pap B) sensitivity in the *lem3Δ* mutant by multicopy suppressors.*lem3Δ* cells transformed with a YEp24-based plasmid containing the indicated gene were cultured in SDA-U medium at 30°C. Cells were serially diluted, and spotted onto YPDA plates containing 0.25 µg/ml or 0.1 µg/ml pap B, followed by incubation for 2.5days at 30°C.
